# Supplementary material for: Aligning diagnostics to the point-of-care: lessons for innovators, evaluators and decision-makers from tuberculosis and HIV
Source: PubMed Central journal article supplement — BMJ Glob Health. 2020 Nov 18;5(11):e003457. doi: 10.1136/bmjgh-2020-003457 (PMC7677375; doi:10.1136/bmjgh-2020-003457), 2020-11-18
Supplement: bmjgh-2020-003457supp001.pdf [file bmjgh-2020-003457supp001.pdf]

| Participant profiles                    | No. of participants | Primary country of employment                                                  |
|-----------------------------------------|---------------------|--------------------------------------------------------------------------------|
| Test developer                          | 22                  | India (5), US (4), China (1), Germany (6), UK (3), Netherlands (2), Canada (1) |
| Industry consultant                     | 4                   | US                                                                             |
| Regulator & WHO                         | 4                   | Switzerland (2), US (2)                                                        |
| Donor                                   | 3                   | US                                                                             |
| NGO/CSO                                 | 8                   | Netherlands (4), Switzerland (2), UK (1), France (1)                           |
| Implementer (programme/medical officer) | 5                   | India                                                                          |
| Laboratory manager                      | 4                   | India                                                                          |
| Laboratory technician                   | 4                   | India                                                                          |
| Nurse                                   | 1                   | India                                                                          |
| Researcher                              | 2                   | India, US                                                                      |
| FIND                                    | 7                   | Geneva (5), India (2)                                                          |
| CHAI                                    | 3                   | South Africa (1), US (1), Tanzania (1)                                         |
| PATH                                    | 1                   | US                                                                             |
| <b>Total</b>                            | <b>68</b>           |                                                                                |
