# Supplementary material for: Aligning diagnostics to the point-of-care: lessons for innovators, evaluators and decision-makers from tuberculosis and HIV
Source: PubMed Central journal article supplement — BMJ Glob Health. 2020 Nov 18;5(11):e003457. doi: 10.1136/bmjgh-2020-003457 (PMC7677375; doi:10.1136/bmjgh-2020-003457), 2020-11-18
Supplement: bmjgh-2020-003457supp002.pdf [file bmjgh-2020-003457supp002.pdf]

**List of Codes**

1. Personal background
2. Steps of development:
  - 2.1. Problem specification/idea generation
  - 2.2. Research & development
  - 2.3. Evaluation
  - 2.4. Deployment, choice
  - 2.5. Implementation/procurement
  - 2.6. Funding/finances/cost
  - 2.7. Regulation, endorsement
  - 2.8. Marketing, distribution, manufacturing
3. Technology description, understanding of technology (implicitly and explicitly mentioned, including promises & imaginaries)
4. Value of diagnosis/Role of diagnosis (f.i. composite activity, implicit and explicitly mentioned, diagnostics vs drugs)
5. Understanding of design/development process (f.i. linear vs consensus based vs redefining value)
6. Politics, vested interests, gatekeeping
7. TPPs
8. Challenges
9. Solutions
10. Samples (anything to do with samples, considerations of sample prep, accessing samples to evaluate)
11. Alignment
  - 11.1. Attuning technology to POC
  - 11.2. Aligning to the bug
  - 11.3. Aligning development steps
  - 11.4. Aligning policies and guidelines
  - 11.5. Understanding of alignment
  - 11.6. Challenges of aligning
  - 11.7. Intermediaries supporting alignment
  - 11.8. POC: understanding, view on (both implicit and explicit)
  - 11.9. POC: Getting to know the POC (incl the market)
  - 11.10. POC: interacting with end-users
  - 11.11. Coordination between actors
12. Iterations, flexibility
13. Trade-offs
14. Simplicity
15. Access, equality
16. Time dimensions, timing
17. Tragedies, failures
18. Evidence making (incl science making, trying to change science)
19. POC vs lab-based testing
20. HIV vs TB

21. Historical changes/history; policy changes
22. Ideal POC diagnostic
23. Ideal POC diagnostic development process
24. Feeding back results to the community
25. Actor roles:
  - 25.1. Global health actor
  - 25.2. Developer/manufacturer
  - 25.3. Implementer/clinician
  - 25.4. Local policymaker
26. Test: (subcodes omitted in this version for reasons of anonymity)
27. Diseases:
  - 27.1. HIV
  - 27.2. TB
  - 27.3. Other diseases
28. Rest
